# Supplementary material for: Competitor analysis of functional group H-bond donor and acceptor properties using the Cambridge Structural Database
Source: Royal Society of Chemistry journal article supplement (doi:10.1039/c8cp05470c), 2018-01-01
Supplement: c8cp05470c1.pdf [file c8cp05470c1.pdf]

**Competitor Analysis of Functional Group H-bond Donor and Acceptor  
Properties Using the Cambridge Structural Database**

James McKenzie and Christopher A. Hunter\*

*Department of Chemistry, University of Cambridge, Lensfield Road, Cambridge CB2 1EW  
(UK)*

**Supplementary Information**

**Table S1.** Experimentally determined solution phase H-bond donor parameters, average functional group values and standard deviations.

| Functional Group            | SMARTS string                                                            | Compounds                 | $\alpha$ |
|-----------------------------|--------------------------------------------------------------------------|---------------------------|----------|
| Primary alcohol             | <chem>[CX4](C(O[H])([H])[H])([F!Cl!Br!I])([F!Cl!Br!I])[F!Cl!Br!I]</chem> | Ethanol                   | 2.72     |
|                             |                                                                          | Butan-1-ol                | 2.71     |
|                             |                                                                          | Hexan-1-ol                | 2.70     |
|                             |                                                                          | Neopentanol               | 2.68     |
|                             |                                                                          | Propan-1-ol               | 2.65     |
|                             |                                                                          | <b>Average</b>            | 2.69     |
|                             |                                                                          | <b>Standard deviation</b> | 0.03     |
| Benzyl primary alcohol      | <chem>c(C(O[H])([H])[H])</chem>                                          | Benzyl alcohol            | 2.96     |
|                             |                                                                          | <b>Average</b>            | 2.96     |
|                             |                                                                          | <b>Standard deviation</b> | 0.00     |
| Halogenated primary alcohol | <chem>[CX4](C)([H])([FClBrI])(C(O[H])([H])[H])</chem>                    | 2-Chloroethanol           | 3.28     |
|                             |                                                                          | 2-Fluoroethanol           | 2.97     |
|                             |                                                                          | <b>Average</b>            | 3.13     |
|                             |                                                                          | <b>Standard deviation</b> | 0.22     |
| Methanol                    | <chem>C(O[H])([H])([H])[H]</chem>                                        | Methanol                  | 2.86     |
|                             |                                                                          | <b>Average</b>            | 2.86     |
|                             |                                                                          | <b>Standard deviation</b> | 0.00     |
| Water                       | <chem>O([H])[H]</chem>                                                   | Water                     | 2.80     |
|                             |                                                                          | <b>Average</b>            | 2.80     |
|                             |                                                                          | <b>Standard deviation</b> | 0.00     |
| Secondary alcohol           | <chem>C(O[H])([Cc])([Cc])[H]</chem>                                      | Propan-2-ol               | 2.69     |
|                             |                                                                          | Cyclohexanol              | 2.58     |

|                   |                                                                                                                                                                                          |                                             |      |
|-------------------|------------------------------------------------------------------------------------------------------------------------------------------------------------------------------------------|---------------------------------------------|------|
|                   |                                                                                                                                                                                          | Cholesterol                                 | 2.62 |
|                   |                                                                                                                                                                                          | Butan-2-ol                                  | 2.54 |
|                   |                                                                                                                                                                                          | <b>Average</b>                              | 2.61 |
|                   |                                                                                                                                                                                          | <b>Standard deviation</b>                   | 0.06 |
| Tertiary alcohol  | <chem>C([CX4])([CX4])([CX4])O[H]</chem>                                                                                                                                                  | tert-Butyl alcohol                          | 2.67 |
|                   |                                                                                                                                                                                          | tert-Pentanol                               | 2.65 |
|                   |                                                                                                                                                                                          | <b>Average</b>                              | 2.66 |
|                   |                                                                                                                                                                                          | <b>Standard deviation</b>                   | 0.01 |
| Primary aniline   | <chem>c:1(:c(:c(:c(:c(:c:1[!F!Cl!Br!!O!N]))[!F!Cl!Br!!O!N])N([H])[H])[!F!Cl!Br!!O!N])[!F!Cl!Br!!O!N])[!F!Cl!Br!!O!N]</chem>                                                              | $\beta$ -Naphthylamine                      | 2.78 |
|                   |                                                                                                                                                                                          | Aniline                                     | 2.40 |
|                   |                                                                                                                                                                                          | $\alpha$ -Naphthylamine                     | 2.60 |
|                   |                                                                                                                                                                                          | <b>Average</b>                              | 2.62 |
|                   |                                                                                                                                                                                          | <b>Standard deviation</b>                   | 0.17 |
| Secondary aniline | <chem>c:1(:c(:c(:c(:c(:c:1[!F!Cl!Br!!O!N]))[!F!Cl!Br!!O!N])N([CX4])[H])[!F!Cl!Br!!O!N])[!F!Cl!Br!!O!N])[!F!Cl!Br!!O!N]</chem>                                                            | N-Methylaniline                             | 2.06 |
|                   |                                                                                                                                                                                          | <b>Average</b>                              | 2.06 |
|                   |                                                                                                                                                                                          | <b>Standard deviation</b>                   | 0.00 |
| Diphenyl aniline  | <chem>c:1(:c(:c(:c(:c(:c:1[!F!Cl!Br!!O!N]))[!F!Cl!Br!!O!N])N(c:2:c(:c(:c(:c:2[!F!Cl!Br!!O!N]))[!F!Cl!Br!!O!N])[!F!Cl!Br!!O!N])[!F!Cl!Br!!O!N])[H])[!F!Cl!Br!!O!N])[!F!Cl!Br!!O!N]</chem> | Diphenylaniline                             | 2.68 |
|                   |                                                                                                                                                                                          | <b>Average</b>                              | 2.68 |
|                   |                                                                                                                                                                                          | <b>Standard deviation</b>                   | 0.00 |
| Oxime             | <chem>N(=C([cCX4])[cCX4])O[H]</chem>                                                                                                                                                     | 4a-phenyloctahydronaphthalen-2(1)-one oxime | 3.00 |

|                         |                                      |                           |      |
|-------------------------|--------------------------------------|---------------------------|------|
|                         |                                      | <b>Average</b>            | 3.00 |
|                         |                                      | <b>Standard deviation</b> | 0.00 |
| Alkyl carboxylic acid   | C(=O)(O[H])[CX4]                     | Acetic acid               | 3.61 |
|                         |                                      | tert-Butanoic acid        | 3.46 |
|                         |                                      | Hexanoic acid             | 3.28 |
|                         |                                      | <b>Average</b>            | 3.45 |
|                         |                                      | <b>Standard deviation</b> | 0.16 |
| Aryl carboxylic acid    | C(=O)(O[H])[c]                       | Benzoic acid              | 3.76 |
|                         |                                      | <b>Average</b>            | 3.76 |
|                         |                                      | <b>Standard deviation</b> | 0.00 |
| Secondary amide N alkyl | [CX4](=O)(C)N([H])[CX4]              | N-Methylacetamide         | 2.92 |
|                         |                                      | N-hexylheptamide          | 2.79 |
|                         |                                      | <b>Average</b>            | 2.86 |
|                         |                                      | <b>Standard deviation</b> | 0.10 |
| Secondary amide N aryl  | C(=O)([CX4])N([H])c                  | Acetanilide               | 3.30 |
|                         |                                      | <b>Average</b>            | 3.30 |
|                         |                                      | <b>Standard deviation</b> | 0.00 |
| Formamide               | C(=O)([H])N([H])[CX4]                | N-Methylformamide         | 2.90 |
|                         |                                      | <b>Average</b>            | 2.90 |
|                         |                                      | <b>Standard deviation</b> | 0.00 |
| Imide                   | N(C(=O)[CX4cCX3])([H])C(=O)[CX4cCX3] | Maleimide                 | 3.39 |
|                         |                                      | Succinimide               | 3.37 |
|                         |                                      | <b>Average</b>            | 3.38 |

|                          |                                                                    |                             |             |
|--------------------------|--------------------------------------------------------------------|-----------------------------|-------------|
|                          |                                                                    | <b>Standard deviation</b>   | 0.01        |
| phenol                   | c:1(:c(:c(:c(:c(:c:1[CcH])[CcH])O[H])<br>)[CcH])[CcH])[CcH]        | 2-Naphthol                  | 3.90        |
|                          |                                                                    | 1-Naphthol                  | 3.80        |
|                          |                                                                    | Phenol                      | 3.80        |
|                          |                                                                    | 4-Phenylphenol              | 3.80        |
|                          |                                                                    | 3-Isopropylphenol           | 3.70        |
|                          |                                                                    | 4-sec-Butylphenol           | 3.70        |
|                          |                                                                    | 3-Methylphenol              | 3.70        |
|                          |                                                                    | 4-Methylphenol              | 3.70        |
|                          |                                                                    | 3_5-Dimethylphenol          | 3.70        |
|                          |                                                                    | 4-Methyl-2-tert-butylphenol | 3.70        |
|                          |                                                                    | 3_4-Dimethylphenol          | 3.60        |
|                          |                                                                    | 4-tert-Butylphenol          | 3.60        |
|                          |                                                                    | 3-Methyl-6-tert-butylphenol | 3.60        |
|                          |                                                                    | 3-Ethylphenol               | 3.60        |
|                          |                                                                    | 4-Octylphenol               | 3.60        |
|                          |                                                                    | 4-Ethylphenol               | 3.60        |
|                          |                                                                    | 4-Propylphenol              | 3.60        |
|                          |                                                                    | 3_4_5-Trimethylphenol       | 3.60        |
|                          |                                                                    | 2_4-di-tert-butylphenol     | 3.60        |
|                          |                                                                    | 2_5-Dimethylphenol          | 3.60        |
|                          |                                                                    | 2_3-Dimethylphenol          | 3.50        |
|                          |                                                                    | 2_4-Dimethylphenol          | 3.50        |
|                          |                                                                    | 2_3_5-Trimethylphenol       | 3.50        |
|                          |                                                                    | 2-Methylphenol              | 3.50        |
|                          |                                                                    | 2-tert-Butylphenol          | 3.40        |
|                          |                                                                    |                             |             |
|                          |                                                                    | <b>Average</b>              | <b>3.64</b> |
|                          |                                                                    | <b>Standard Deviation</b>   | <b>0.12</b> |
|                          |                                                                    |                             |             |
| Ortho halogenated phenol | c:1(:c(:c(:c(:c(:c:1[CcH1])[CcH1])O[H])<br>)[FCIBrI])[CcH1])[CcH1] | 2-Chlorophenol              | 4.02        |
|                          |                                                                    |                             |             |
|                          |                                                                    | <b>Average</b>              | <b>4.02</b> |
|                          |                                                                    | <b>Standard Deviation</b>   | <b>0.00</b> |
|                          |                                                                    |                             |             |
| Meta halogenated phenol  | c:1(:c(:c(:c(:c(:c:1[CcH1])[CcH1])O[H])<br>)[CcH1])[FCIBrI])[CcH1] | 3-Bromophenol               | 4.22        |

|                         |                                                                         |                                     |             |
|-------------------------|-------------------------------------------------------------------------|-------------------------------------|-------------|
|                         |                                                                         | 3-Chlorophenol                      | 4.19        |
|                         |                                                                         | 3-Fluorophenol                      | 4.13        |
|                         |                                                                         | <b>Average</b>                      | 4.18        |
|                         |                                                                         | <b>Standard Deviation</b>           | 0.05        |
|                         |                                                                         |                                     |             |
| Para halogenated phenol | <chem>c:1(:c(:c(:c(:c:1[CcH1])[CcH1])O[H])[CcH1])[CcH1])[FClBrI]</chem> | 4-Iodophenol                        | 4.14        |
|                         |                                                                         | 4-Bromophenol                       | 4.11        |
|                         |                                                                         | 4-Chlorophenol                      | 4.10        |
|                         |                                                                         | 4-Fluorophenol                      | 3.93        |
|                         |                                                                         | <b>Average</b>                      | 4.07        |
|                         |                                                                         | <b>Standard Deviation</b>           | 0.09        |
|                         |                                                                         |                                     |             |
| Thiol                   | <chem>[CX4]S[H]</chem>                                                  | Propyl sulphide                     | 1.44        |
|                         |                                                                         | Ethyl sulphide                      | 1.39        |
|                         |                                                                         | Butyl sulphide                      | 1.28        |
|                         |                                                                         | Isopropyl sulphide                  | 1.28        |
|                         |                                                                         | t-Butyl sulphide                    | 1.28        |
|                         |                                                                         | <b>Average</b>                      | 1.33        |
|                         |                                                                         | <b>Standard Deviation</b>           | 0.07        |
|                         |                                                                         |                                     |             |
| Secondary Thioamide     | <chem>C(=S)([cCX4])N([CX4c])[H]</chem>                                  | Thioacetamide                       | 3.70        |
|                         |                                                                         | Thioacetanilide                     | 3.40        |
|                         |                                                                         | <b>Average</b>                      | 3.55        |
|                         |                                                                         | <b>Standard Deviation</b>           | 0.21        |
|                         |                                                                         |                                     |             |
| Secondary Sulphonamide  | <chem>[cC]S(=O)(=O)N([H])([cC])</chem>                                  | N-(2-Naphthyl)toluene-p-sulfonamide | 3.20        |
|                         |                                                                         | Toluene-p-sulfonamide               | 3.20        |
|                         |                                                                         | N-Benzyltoluene-p-sulfonamide       | 3.00        |
|                         |                                                                         | <b>Average</b>                      | <b>3.13</b> |
|                         |                                                                         | <b>Standard Deviation</b>           | <b>0.12</b> |
|                         |                                                                         |                                     |             |
| Thiophenol              | <chem>c:1:c:c(:c:c:1)S[H]</chem>                                        | Thiophenol                          | 1.40        |

|                              |                                                           |                                   |             |
|------------------------------|-----------------------------------------------------------|-----------------------------------|-------------|
|                              |                                                           |                                   |             |
|                              |                                                           | <b>Average</b>                    | <b>1.40</b> |
|                              |                                                           | <b>Standard Deviation</b>         | <b>0.00</b> |
|                              |                                                           |                                   |             |
| Secondary carbamate N aryl   | <chem>O(C(=O)N([H])[c])[CX4]</chem>                       | N-Phenylurethane                  | 2.82        |
|                              |                                                           |                                   |             |
|                              |                                                           | <b>Average</b>                    | <b>2.82</b> |
|                              |                                                           | <b>Standard Deviation</b>         | <b>0.00</b> |
|                              |                                                           |                                   |             |
| Thiourea N alkyl<br>NN alkyl | <chem>C(=S)(N([CX4])[H])N([CX4])[CX4]</chem>              | N-Methyl-N_N'-propylenethiourea   | 3.03        |
|                              |                                                           |                                   |             |
|                              |                                                           | <b>Average</b>                    | <b>3.03</b> |
|                              |                                                           | <b>Standard Deviation</b>         | <b>0.00</b> |
|                              |                                                           |                                   |             |
| Pyrrole                      | <chem>N1(C(=C(C(=C1[CX4H])[CX4H])[CX4H])[CX4H])[H]</chem> | Pyrrole                           | 3.02        |
|                              |                                                           |                                   |             |
|                              |                                                           | <b>Average</b>                    | <b>3.03</b> |
|                              |                                                           | <b>Standard Deviation</b>         | <b>0.00</b> |
|                              |                                                           |                                   |             |
| Indole                       | <chem>N1(C=Cc:2c1:c:c:c:2)[H]</chem>                      | Indole                            | 3.14        |
|                              |                                                           |                                   |             |
|                              |                                                           | <b>Average</b>                    | <b>3.14</b> |
|                              |                                                           | <b>Standard Deviation</b>         | <b>0.00</b> |
|                              |                                                           |                                   |             |
| Pyrazole                     | <chem>N1=CC=CN1[H]</chem>                                 | pyrazole                          | 3.61        |
|                              |                                                           | 3-methylpyrazole                  | 3.57        |
|                              |                                                           | 5-methylpyrazole                  | 3.57        |
|                              |                                                           | 3_5-dimethylpyrazole              | 3.57        |
|                              |                                                           | 4-methylpyrazole                  | 3.53        |
|                              |                                                           | 3_4_5-trimethylpyrazole           | 3.36        |
|                              |                                                           |                                   |             |
|                              |                                                           | <b>Average</b>                    | <b>3.53</b> |
|                              |                                                           | <b>Standard Deviation</b>         | <b>0.09</b> |
|                              |                                                           |                                   |             |
| 1,2,3 Triazole               | <chem>N1=CC=NN1[H]</chem>                                 | 3-Methylthio-1_2_3-Triazole       | 3.94        |
|                              |                                                           | 4-Trifluoromethane-1_2_3-triazole | 4.34        |
|                              |                                                           |                                   |             |

|                |              |                            |      |
|----------------|--------------|----------------------------|------|
|                |              | <b>Average</b>             | 4.14 |
|                |              | <b>Standard Deviation</b>  | 0.28 |
|                |              |                            |      |
| 1,3,4 Triazole | C1=NC=NN1[H] | 3-Triazolepropylphenyl     | 3.80 |
|                |              |                            |      |
|                |              | <b>Average</b>             | 3.80 |
|                |              | <b>Standard Deviation</b>  | 0.00 |
|                |              |                            |      |
| Tetrazole      | N1=NN=CN1[H] | 5-Phenyl-1_2_3_4-tetrazole | 4.97 |
|                |              |                            |      |
|                |              | <b>Average</b>             | 3.53 |
|                |              | <b>Standard Deviation</b>  | 0.09 |

**Table S2.** Experimentally determined solution phase H-bond acceptor parameters, average functional group values and standard deviations.

| Functional Group            | SMARTS string                                                  | Compounds                 | $\beta$ |
|-----------------------------|----------------------------------------------------------------|---------------------------|---------|
| Primary alcohol             | [CX4](C(O[H])([H])[H])([!F!Cl!Br!I])([!F!Cl!Br!I])[!F!Cl!Br!I] | Octan-1-ol                | 5.36    |
|                             |                                                                | Propan-1-ol               | 5.25    |
|                             |                                                                | Ethanol                   | 5.15    |
|                             |                                                                | <b>Average</b>            | 5.25    |
|                             |                                                                | <b>Standard Deviation</b> | 0.10    |
|                             |                                                                |                           |         |
| Benzyl primary alcohol      | c(C(O[H])([H])[H])                                             | Benzyl alcohol            | 4.94    |
|                             |                                                                | <b>Average</b>            | 4.94    |
|                             |                                                                | <b>Standard Deviation</b> | 0.00    |
|                             |                                                                |                           |         |
| Halogenated primary alcohol | [CX4](C)([H])([FClBrI])(C(O[H])([H])[H])                       | 2-Fluoroethanol           | 4.33    |
|                             |                                                                | 2-Bromoethanol            | 4.22    |
|                             |                                                                | 2-Chloroethanol           | 4.22    |
|                             |                                                                | <b>Average</b>            | 4.26    |
|                             |                                                                | <b>Standard Deviation</b> | 0.06    |
|                             |                                                                |                           |         |
| Methanol                    | C(O[H])([H])([H])[H]                                           | Methanol                  | 4.84    |
|                             |                                                                | <b>Average</b>            | 4.84    |
|                             |                                                                | <b>Standard Deviation</b> | 0.00    |
|                             |                                                                |                           |         |
| Water                       | O([H])[H]                                                      | Water                     | 4.50    |
|                             |                                                                | <b>Average</b>            | 4.50    |
|                             |                                                                | <b>Standard Deviation</b> | 0.00    |
|                             |                                                                |                           |         |
| Secondary alcohol           | C(O[H])([Cc])([Cc])[H]                                         | Cyclohexanol              | 5.56    |
|                             |                                                                | Propan-2-ol               | 5.46    |

|                             |                                                                  |                           |      |
|-----------------------------|------------------------------------------------------------------|---------------------------|------|
|                             |                                                                  |                           |      |
|                             |                                                                  | <b>Average</b>            | 5.51 |
|                             |                                                                  | <b>Standard Deviation</b> | 0.07 |
|                             |                                                                  |                           |      |
| Tertiary alcohol            | <chem>C([cC])([cC])([cC])O[H]</chem>                             | Tert-butyl alcohol        | 5.70 |
|                             |                                                                  |                           |      |
|                             |                                                                  | <b>Average</b>            | 5.70 |
|                             |                                                                  | <b>Standard Deviation</b> | 0.00 |
|                             |                                                                  |                           |      |
|                             |                                                                  |                           |      |
| Alkyl alkyl ether           | <chem>C(OC([!c])([!c])[!c])([!c])([!c])[!c]</chem>               | 2-Methyltetrahydrofuran   | 6.00 |
|                             |                                                                  | Tetrahydrofuran           | 5.90 |
|                             |                                                                  | Tetrahydropyran           | 5.80 |
|                             |                                                                  | tert-Butyl methyl ether   | 5.70 |
|                             |                                                                  | Diisopropyl ether         | 5.50 |
|                             |                                                                  | tert-Butyl ethyl ether    | 5.50 |
|                             |                                                                  | Dipentyl ether            | 5.40 |
|                             |                                                                  | Diethyl ether             | 5.30 |
|                             |                                                                  | Dipropyl ether            | 5.20 |
|                             |                                                                  | n-Propylethylether        | 5.20 |
|                             |                                                                  | Dimethyl ether            | 5.10 |
|                             |                                                                  | Dibutyl ether             | 5.00 |
|                             |                                                                  |                           |      |
|                             |                                                                  | <b>Average</b>            | 5.55 |
|                             |                                                                  | <b>Standard Deviation</b> | 0.33 |
|                             |                                                                  |                           |      |
| Allyl ether                 | <chem>C(OC([!c])([!c])(C=C))([!c])(C=C)[!c]</chem>               | Diallyl ether             | 4.60 |
|                             |                                                                  |                           |      |
|                             |                                                                  | <b>Average</b>            | 4.60 |
|                             |                                                                  | <b>Standard Deviation</b> | 0.00 |
|                             |                                                                  |                           |      |
| Alkyl aryl ether            | <chem>cO[CX4]</chem>                                             | Anisole                   | 3.30 |
|                             |                                                                  |                           |      |
|                             |                                                                  | <b>Average</b>            | 3.30 |
|                             |                                                                  | <b>Standard Deviation</b> | 0.00 |
|                             |                                                                  |                           |      |
| Alkyl alkyl ether<br>benzyl | <chem>O(C(C:1:c:c:c:c:1)([H])[H])C(C:2:c:c:c:c:2)([H])[H]</chem> | Dibenzyl ether            | 4.50 |
|                             |                                                                  |                           |      |

|                 |                          |                           |      |
|-----------------|--------------------------|---------------------------|------|
|                 |                          | <b>Average</b>            | 3.30 |
|                 |                          | <b>Standard Deviation</b> | 0.00 |
| Aryl aryl ether | cOc                      | Diphenyl ether            | 3.10 |
|                 |                          |                           |      |
|                 |                          | <b>Average</b>            | 3.10 |
|                 |                          | <b>Standard Deviation</b> | 0.00 |
|                 |                          |                           |      |
| Lactone         | [CX4]1C[CX4]C(O1)=O      | $\delta$ -Valerolactone   | 6.55 |
|                 |                          | $\gamma$ -Valerolactone   | 6.24 |
|                 |                          | $\gamma$ -Butyrolactone   | 5.99 |
|                 |                          |                           |      |
|                 |                          | <b>Average</b>            | 6.26 |
|                 |                          | <b>Standard Deviation</b> | 0.28 |
|                 |                          |                           |      |
| Vinyl ester     | C=C([H])OC(=O)([CX4])    | Vinyl Acetate             | 4.72 |
|                 |                          |                           |      |
|                 |                          | <b>Average</b>            | 4.72 |
|                 |                          | <b>Standard Deviation</b> | 0.00 |
|                 |                          |                           |      |
| Carbonate       | [CX4c]OC(=O)O[CX4c]      | S-ethyl methyl carbonate  | 4.68 |
|                 |                          |                           |      |
|                 |                          | <b>Average</b>            | 4.68 |
|                 |                          | <b>Standard Deviation</b> | 0.00 |
|                 |                          |                           |      |
| Formate         | [H]C(=O)O([CX4])         | Ethyl formate             | 4.53 |
|                 |                          | Methyl formate            | 4.52 |
|                 |                          | Phenylformate             | 4.51 |
|                 |                          |                           |      |
|                 |                          | <b>Average</b>            | 4.52 |
|                 |                          | <b>Standard Deviation</b> | 0.01 |
|                 |                          |                           |      |
| Oxalate         | [Cc]OC(=O)(C(=O)(O[cC])) | Diethyl oxalate           | 4.51 |
|                 |                          |                           |      |
|                 |                          | <b>Average</b>            | 4.51 |
|                 |                          | <b>Standard Deviation</b> | 0.00 |
|                 |                          |                           |      |
| Coumarin        | O1C(=O)C=CC=C1           | Coumarin                  | 5.95 |
|                 |                          |                           |      |

|                        |                                           |                           |      |
|------------------------|-------------------------------------------|---------------------------|------|
|                        |                                           | <b>Average</b>            | 5.95 |
|                        |                                           | <b>Standard Deviation</b> | 0.00 |
| Anhydride              | [CX4c]C(=O)OC(=O)[CX4c]                   | Acetic anhydride          | 6.40 |
|                        |                                           | <b>Average</b>            | 6.40 |
|                        |                                           | <b>Standard Deviation</b> | 0.00 |
| Tri halo esters        | C(C(=O)O[Cc])([FClBrI])([FClBrI])[FClBrI] | Ethyl trichloroacetate    | 3.40 |
|                        |                                           | Methyl trichloroacetate   | 3.31 |
|                        |                                           | Ethyl trifluoroacetate    | 3.24 |
|                        |                                           | <b>Average</b>            | 3.31 |
|                        |                                           | <b>Standard Deviation</b> | 0.08 |
| Benzoate               | c:1:c:c(:c:c:c:1)C(=O)O[CX4]              | Ethyl 3-methylbenzoate    | 5.31 |
|                        |                                           | tert-Butyl benzoate       | 5.22 |
|                        |                                           | Ethyl benzoate            | 5.15 |
|                        |                                           | Ethyl 4-cyanobenzoate     | 5.06 |
|                        |                                           | Methyl benzoate           | 5.04 |
|                        |                                           | Ethyl 4-fluorobenzoate    | 5.02 |
|                        |                                           | <b>Average</b>            | 5.13 |
|                        |                                           | <b>Standard Deviation</b> | 0.11 |
| Mono halogenated ester | [CX4]C(=O)O[CX4]([CH])([CH])[FClBrI]      | Ethyl fluoroacetate       | 4.71 |
|                        |                                           | Ethyl chloroacetate       | 4.55 |
|                        |                                           | <b>Average</b>            | 4.63 |
|                        |                                           | <b>Standard Deviation</b> | 0.11 |
| Alkyl alkyl ester      | [CX4!R]C(=O)O[CX4!R]                      | sec-Butyl acetate         | 5.64 |
|                        |                                           | Propyl ethanoate          | 5.62 |
|                        |                                           | Isopropyl ethanoate       | 5.62 |
|                        |                                           | Isobutyl acetate          | 5.59 |
|                        |                                           | (E)-Ethyl cinnamate       | 5.59 |
|                        |                                           | Butyl acetate             | 5.57 |
|                        |                                           | Ethyl 4-methoxybenzoate   | 5.57 |

|                      |                             |                                |      |
|----------------------|-----------------------------|--------------------------------|------|
|                      |                             | Methyl-cyclopropanecarboxylate | 5.55 |
|                      |                             | Ethyl cyclopropanecarboxylate  | 5.55 |
|                      |                             | Ethyl isovalerate              | 5.53 |
|                      |                             | Ethyl butyrate                 | 5.53 |
|                      |                             | tert-Butyl ethanoate           | 5.51 |
|                      |                             | Ethyl isobutyrate              | 5.48 |
|                      |                             | Ethyl propionate               | 5.46 |
|                      |                             | Ethyl ethanoate                | 5.44 |
|                      |                             | Methyl cyclohexanecarboxylate  | 5.42 |
|                      |                             | Ethyl 1-adamantanecarboxylate  | 5.42 |
|                      |                             | Ethyl 4-methylbenzoate         | 5.39 |
|                      |                             | Ethyl phenylacetate            | 5.39 |
|                      |                             | Ethyl 2_2-dimethylpropanoate   | 5.37 |
|                      |                             |                                |      |
|                      |                             | <b>Average</b>                 | 5.51 |
|                      |                             | <b>Standard Deviation</b>      | 0.08 |
|                      |                             |                                |      |
| Primary amine        | N([H])([H])C([H])([H])[CX4] | Adamantan-1-amine              | 8.19 |
|                      |                             | c-Hexylamine                   | 8.15 |
|                      |                             | Octadecylamine                 | 8.14 |
|                      |                             | n-octylamine                   | 8.11 |
|                      |                             | tert-butylamine                | 8.08 |
|                      |                             | n-Hexadecylamine               | 8.08 |
|                      |                             | Isopropylamine                 | 7.99 |
|                      |                             | n-Butylamine                   | 7.97 |
|                      |                             | ethylamine                     | 7.88 |
|                      |                             | Methylamine                    | 7.84 |
|                      |                             | Hexylamine                     | 7.73 |
|                      |                             | Heptylamine                    | 7.73 |
|                      |                             |                                |      |
|                      |                             | <b>Average</b>                 | 7.99 |
|                      |                             | <b>Standard Deviation</b>      | 0.16 |
|                      |                             |                                |      |
| Primary benzyl amine | N([H])([H])C([H])([H])c     | 3-methylbenzylamine            | 7.44 |
|                      |                             | benzylamine                    | 7.24 |
|                      |                             |                                |      |
|                      |                             | <b>Average</b>                 | 7.34 |
|                      |                             | <b>Standard Deviation</b>      | 0.14 |

|                          |                                                                                     |                           |      |
|--------------------------|-------------------------------------------------------------------------------------|---------------------------|------|
|                          |                                                                                     |                           |      |
| Allyl amine              |                                                                                     | Allylamine                | 7.37 |
|                          |                                                                                     | <b>Average</b>            | 7.37 |
|                          |                                                                                     | <b>Standard Deviation</b> | 0.10 |
|                          |                                                                                     |                           |      |
| Acyclic secondary amine  | <chem>N([H])([CX4!R1])([!c])([!c])[!c][CX4!R1]([!c])([!c])[!c]</chem>               | dimethylamine             | 8.10 |
|                          |                                                                                     | N-methylethylamine        | 8.10 |
|                          |                                                                                     | Dipropylamine             | 7.90 |
|                          |                                                                                     | Dibutylamine              | 7.90 |
|                          |                                                                                     | Dipentylamine             | 7.90 |
|                          |                                                                                     | <b>Average</b>            | 7.98 |
|                          |                                                                                     | <b>Standard Deviation</b> | 0.11 |
|                          |                                                                                     |                           |      |
| Cyclic secondary amine   | <chem>[NR]([H])([CX4R])([CX4R])</chem>                                              | pyrrolidine               | 8.80 |
|                          |                                                                                     | azetidine                 | 8.80 |
|                          |                                                                                     | piperidine                | 8.30 |
|                          |                                                                                     | <b>Average</b>            | 8.63 |
|                          |                                                                                     | <b>Standard Deviation</b> | 0.29 |
|                          |                                                                                     |                           |      |
| Dibenzyl secondary amine | <chem>N([H])([CX4!R1])([!c])([!c])[c][CX4!R1]([!c])([!c])[c]</chem>                 | Dibenzylamine             | 6.27 |
|                          |                                                                                     | <b>Average</b>            | 6.27 |
|                          |                                                                                     | <b>Standard Deviation</b> | 0.00 |
|                          |                                                                                     |                           |      |
| Tertiary amine           | <chem>N([CX4]([!c])([!c])[!c])([CX4]([!c])([!c])[!c])([CX4]([!c])([!c])[!c])</chem> | trimethylamine            | 7.79 |
|                          |                                                                                     | N-methylpiperidine        | 7.75 |
|                          |                                                                                     | Triethylamine             | 7.51 |
|                          |                                                                                     | Trioctylamine             | 7.00 |
|                          |                                                                                     | Tributylamine             | 6.77 |
|                          |                                                                                     | Tripentylamine            | 6.90 |
|                          |                                                                                     | <b>Average</b>            | 7.29 |
|                          |                                                                                     | <b>Standard Deviation</b> | 0.45 |

|                                   |                                                                                                   |                           |      |
|-----------------------------------|---------------------------------------------------------------------------------------------------|---------------------------|------|
| Triallyl amine                    | <chem>N([C]([C])C=C)([C]([C])C=C)([C]([C])C=C)</chem>                                             | Triallylamine             | 6.14 |
|                                   |                                                                                                   | <b>Average</b>            | 6.14 |
|                                   |                                                                                                   | <b>Standard Deviation</b> | 0.00 |
| Tribenzyl amine                   | <chem>N([C]([C])c)([C]([C])c)([C]([C])c)</chem>                                                   | Tribenzylamine            | 3.79 |
|                                   |                                                                                                   | <b>Average</b>            | 3.79 |
|                                   |                                                                                                   | <b>Standard Deviation</b> | 0.00 |
| Primary aniline                   | <chem>c1(:c(:c(:c(:c1[F]ClBrIO[N])[F]ClBrIO[N])N([H])[H])[F]ClBrIO[N])[F]ClBrIO[N]</chem>         | 4-Methylaniline           | 4.94 |
|                                   |                                                                                                   | 3-Methylaniline           | 4.69 |
|                                   |                                                                                                   | 2-Methylaniline           | 4.53 |
|                                   |                                                                                                   | Aniline                   | 4.51 |
|                                   |                                                                                                   | <b>Average</b>            | 4.67 |
|                                   |                                                                                                   | <b>Standard Deviation</b> | 0.20 |
| Para halogenated primary aniline  | <chem>c1(:c(:c(:c(:c1[F]ClBrIO[N])[F]ClBrIO[N])N([H])[H])[F]ClBrIO[N])[FCIBr]</chem>              | 4-Fluoroaniline           | 4.35 |
|                                   |                                                                                                   | 4-Chloroaniline           | 4.10 |
|                                   |                                                                                                   | 4-Bromoaniline            | 4.08 |
|                                   |                                                                                                   | 4-Iodoaniline             | 3.84 |
|                                   |                                                                                                   | <b>Average</b>            | 4.09 |
|                                   |                                                                                                   | <b>Standard Deviation</b> | 0.21 |
| Ortho halogenated primary aniline | <chem>c1(:c(:c(:c(:c1[F]ClBrIO[N])[F]ClBrIO[N])N([H])[H])[F]ClBrIO[N])[FCIBrI][F]ClBrIO[N]</chem> | 3-Fluoroaniline           | 3.74 |
|                                   |                                                                                                   | 3-Chloroaniline           | 3.58 |
|                                   |                                                                                                   | 3-Iodoaniline             | 3.58 |
|                                   |                                                                                                   | 3-Bromoaniline            | 3.44 |
|                                   |                                                                                                   | <b>Average</b>            | 3.59 |

|                              |                                |                             |      |
|------------------------------|--------------------------------|-----------------------------|------|
|                              |                                | <b>Standard Deviation</b>   | 0.12 |
| Alkyl alkyl tertiary aniline | c:1:c:c:c(:c:c:1)N([CX4])[CX4] | N_N-Diethylaniline          | 4.90 |
|                              |                                | N_N-Dimethylaniline         | 4.20 |
|                              |                                | <b>Average</b>              | 4.55 |
|                              |                                | <b>Standard Deviation</b>   | 0.49 |
| Alkyl aldehyde               | C(=O)([H])[CX4]                | Butanaldehyde               | 4.70 |
|                              |                                | Decanaldehyde               | 4.70 |
|                              |                                | Propanaldehyde              | 4.60 |
|                              |                                | Octanaldehyde               | 4.60 |
|                              |                                | Acetaldehyde                | 4.50 |
|                              |                                | <b>Average</b>              | 4.62 |
|                              |                                | <b>Standard Deviation</b>   | 0.08 |
| Aryl aldehyde                | C(=O)([H])[c]                  | Benzaldehyde                | 4.80 |
|                              |                                | <b>Average</b>              | 4.80 |
|                              |                                | <b>Standard Deviation</b>   | 0.00 |
| Cyclic ketone                | [CX4R][CR](=O)[CX4R]           | Cyclooctanone               | 6.28 |
|                              |                                | Cycloheptanone              | 6.19 |
|                              |                                | Cyclohexanone               | 6.15 |
|                              |                                | Camphor                     | 5.97 |
|                              |                                | 1-Adamantyl methyl ketone   | 5.95 |
|                              |                                | Cyclopentanone              | 5.88 |
|                              |                                | 2-Methylcyclohexanone       | 5.88 |
|                              |                                | Cyclododecanone             | 5.79 |
|                              |                                | Cyclopentadecanone          | 5.77 |
|                              |                                | Cycloundecanone             | 5.73 |
|                              |                                | <b>Average</b>              | 5.96 |
|                              |                                | <b>Standard Deviation</b>   | 0.19 |
| Acetophenone                 | C(=O)([CX4])c:1:c:c:c:c:1      | 4-(1-Adamantyl)acetophenone | 5.95 |
|                              |                                | 4-tert-Butylacetophenone    | 5.84 |

|                         |                                                                    |                           |      |
|-------------------------|--------------------------------------------------------------------|---------------------------|------|
|                         |                                                                    | 4-Ethylacetophenone       | 5.84 |
|                         |                                                                    | 4-Methylacetophenone      | 5.82 |
|                         |                                                                    | 4-Isopropylacetophenone   | 5.75 |
|                         |                                                                    | Acetophenone              | 5.53 |
|                         |                                                                    | 3-Methylacetophenone      | 5.51 |
|                         |                                                                    |                           |      |
|                         |                                                                    | <b>Average</b>            | 5.75 |
|                         |                                                                    | <b>Standard Deviation</b> | 0.17 |
|                         |                                                                    |                           |      |
| Acyclic dialkyl ketone  | <chem>C(=O)([CX4!R]([!c])([!c])[!c])[CX4!R]([!c])([!c])[!c]</chem> | Cyclohexyl methyl ketone  | 5.82 |
|                         |                                                                    | 3-Methylpentan-2-one      | 5.77 |
|                         |                                                                    | Butan-2-one               | 5.77 |
|                         |                                                                    | 3-Methylbutan-2-one       | 5.73 |
|                         |                                                                    | Hexan-2-one               | 5.68 |
|                         |                                                                    | Propan-2-one              | 5.68 |
|                         |                                                                    | 4-Methylpentan-2-one      | 5.66 |
|                         |                                                                    | Pentan-2-one              | 5.66 |
|                         |                                                                    | Di-(1-adamantyl)ketone    | 5.66 |
|                         |                                                                    | Pentan-3-one              | 5.59 |
|                         |                                                                    | Heptan-4-one              | 5.59 |
|                         |                                                                    | Hexan-3-one               | 5.57 |
|                         |                                                                    | Methyl isopropyl ketone   | 5.63 |
|                         |                                                                    |                           |      |
|                         |                                                                    | <b>Average</b>            | 5.68 |
|                         |                                                                    | <b>Standard Deviation</b> | 0.07 |
|                         |                                                                    |                           |      |
| Diaryl ketone           | <chem>C(=O)(c:1:c:c:c:c:1)c:2:c:c:c:c:2</chem>                     | Benzophenone              | 5.44 |
|                         |                                                                    | Anthrone                  | 5.64 |
|                         |                                                                    |                           |      |
|                         |                                                                    | <b>Average</b>            | 5.54 |
|                         |                                                                    | <b>Standard Deviation</b> | 0.14 |
|                         |                                                                    |                           |      |
| Dibenzyl ketone         | <chem>[C!R](=O)([CX4]c)([CX4]c)</chem>                             | Dibenzyl ketone           | 5.30 |
|                         |                                                                    |                           |      |
|                         |                                                                    | <b>Average</b>            | 5.54 |
|                         |                                                                    | <b>Standard Deviation</b> | 0.14 |
|                         |                                                                    |                           |      |
| Mono halogenated ketone | <chem>[C!R](=O)([CX4!R])C(Cl)([CH])[C H]</chem>                    | Chloropropan-2-one        | 4.53 |

|                           |                                                            |                                       |      |
|---------------------------|------------------------------------------------------------|---------------------------------------|------|
|                           |                                                            |                                       |      |
|                           |                                                            | <b>Average</b>                        | 4.53 |
|                           |                                                            | <b>Standard Deviation</b>             | 0.00 |
|                           |                                                            |                                       |      |
| Tri halogenated ketone    | <chem>C(=O)([CX4!R])C([FClBrI])([FClBrI])([FClBrI])</chem> | 1_1_1-Trichloropropan-2-one           | 3.06 |
|                           |                                                            | 1_1_1-Trifluoropropan-2-one           | 2.93 |
|                           |                                                            |                                       |      |
|                           |                                                            | <b>Average</b>                        | 3.00 |
|                           |                                                            | <b>Standard Deviation</b>             | 0.09 |
|                           |                                                            |                                       |      |
| Cyclohexene-one           | <chem>C1C=CC([CX4]C1)=O</chem>                             | Piperitone                            | 6.14 |
|                           |                                                            |                                       |      |
|                           |                                                            | <b>Average</b>                        | 6.14 |
|                           |                                                            | <b>Standard Deviation</b>             | 0.00 |
|                           |                                                            |                                       |      |
| O aryl substituted Oxime  | <chem>cON=C([cCX4])([cCX4])</chem>                         | Acetone O-phenyloxime                 | 4.77 |
|                           |                                                            |                                       |      |
|                           |                                                            | <b>Average</b>                        | 4.77 |
|                           |                                                            | <b>Standard Deviation</b>             | 0.00 |
|                           |                                                            |                                       |      |
| O alkyl substituted Oxime | <chem>[CX4]ON=C([cCX4])([cCX4])</chem>                     | (1E)-Cyclohex-3-en-1-one O-decyloxime | 5.49 |
|                           |                                                            |                                       |      |
|                           |                                                            | <b>Average</b>                        | 5.49 |
|                           |                                                            | <b>Standard Deviation</b>             | 0.00 |
|                           |                                                            |                                       |      |
| Alkyl Carboxylic acid     | <chem>C(=O)(O[H])[CX4]</chem>                              | Butanoic acid                         | 4.90 |
|                           |                                                            |                                       |      |
|                           |                                                            | <b>Average</b>                        | 4.90 |
|                           |                                                            | <b>Standard Deviation</b>             | 0.00 |
|                           |                                                            |                                       |      |
| Aryl Carboxylic acid      | <chem>C(=O)(O[H])[c]</chem>                                | Benzoic acid                          | 4.90 |
|                           |                                                            |                                       |      |
|                           |                                                            | <b>Average</b>                        | 4.90 |
|                           |                                                            | <b>Standard Deviation</b>             | 0.00 |
|                           |                                                            |                                       |      |

|                              |                         |                                               |      |
|------------------------------|-------------------------|-----------------------------------------------|------|
| Tertiary amide NN<br>dialkyl | [CX4]C(=O)N([CX4])[CX4] | N-Methylcaprolactam                           | 8.68 |
|                              |                         | N_N-Diethylacetamide                          | 8.55 |
|                              |                         | 1-Methyl-2-piperidone                         | 8.84 |
|                              |                         | N_N-Dimethylacetamide                         | 8.48 |
|                              |                         | N_N-Dicyclohexylacetamide                     | 8.42 |
|                              |                         | 1-methyl-2-pyrrolidone                        | 8.35 |
|                              |                         | N_N-Dimethylpropionamide                      | 8.31 |
|                              |                         | N-Acetylpiperidine                            | 8.17 |
|                              |                         | N_N-Dicyclohexylpropionamide                  | 7.99 |
|                              |                         | N-Butyrylpiperidine                           | 7.97 |
|                              |                         | N_N-Diethylnonamide                           | 7.93 |
|                              |                         | N_N-Dimethylsobutylamide                      | 7.93 |
|                              |                         | N_N-Diethylbutanamide                         | 7.87 |
|                              |                         | N_N-Diethylpropanamide                        | 7.71 |
|                              |                         | N_N-Dimethyltertbutylamide                    | 7.73 |
|                              |                         | N_N-Dicyclohexyl-2_2-<br>dimethylpropionamide | 7.64 |
|                              |                         |                                               |      |
|                              |                         | <b>Average</b>                                | 8.16 |
|                              |                         | <b>Standard Deviation</b>                     | 0.37 |
| Tertiary amide NN<br>diaryl  | [CX4]C(=O)N(c)c         | N_N-Diphenylacetamide                         | 7.37 |
|                              |                         | N_N-Diphenylbutanamide                        | 7.08 |
|                              |                         | N_N-Diphenylpropanamide                       | 6.95 |
|                              |                         |                                               |      |
|                              |                         | <b>Average</b>                                | 7.13 |
|                              |                         | <b>Standard Deviation</b>                     | 0.22 |
| Tertiary Benzamide           | [c]C(=O)N([CX4])[CX4]   | N_N-Dimethyl-4-<br>methylbenzamide            | 8.11 |
|                              |                         | N_N-Dicyclohexylbenzamide                     | 8.02 |
|                              |                         | N_N-Dimethylbenzamide                         | 8.02 |
|                              |                         | N-Benzoylpiperidine                           | 7.87 |
|                              |                         | N_N-Diethylbenzamide                          | 7.83 |
|                              |                         |                                               |      |
|                              |                         | <b>Average</b>                                | 7.97 |
|                              |                         | <b>Standard Deviation</b>                     | 0.03 |
|                              |                         |                                               |      |

|                                               |                                       |                              |      |
|-----------------------------------------------|---------------------------------------|------------------------------|------|
| Secondary alkyl amide                         | C(=O)([CX4])N([H])[CX4]               | N-Methylacetamide            | 8.17 |
|                                               |                                       | N-Ethylacetamide             | 8.15 |
|                                               |                                       | N-Methylpropionamide         | 8.04 |
|                                               |                                       | N-Propionylpiperidine        | 8.00 |
|                                               |                                       |                              |      |
|                                               |                                       | <b>Average</b>               | 8.09 |
|                                               |                                       | <b>Standard Deviation</b>    | 0.08 |
|                                               |                                       |                              |      |
| Secondary benzamide                           |                                       | N-methylbenzamide            | 7.57 |
|                                               |                                       |                              |      |
|                                               |                                       | <b>Average</b>               | 7.57 |
|                                               |                                       | <b>Standard Deviation</b>    | 0.00 |
|                                               |                                       |                              |      |
| Formamide                                     | C(=O)([H])N([H])[CX4]                 | N,N-Dimethylformamide        | 7.73 |
|                                               |                                       | N,N-Diethylformamide         | 7.68 |
|                                               |                                       | 1-Formylpiperidine           | 7.66 |
|                                               |                                       |                              |      |
|                                               |                                       | <b>Average</b>               | 7.69 |
|                                               |                                       | <b>Standard Deviation</b>    | 0.03 |
|                                               |                                       |                              |      |
| Imide                                         | N(C(=O)[CX4cCX3])([Cc])C(=O)[CX4cCX3] | N-Methylsuccinimide          | 6.08 |
|                                               |                                       | N-Methylmaleimide            | 5.77 |
|                                               |                                       |                              |      |
|                                               |                                       | <b>Average</b>               | 5.93 |
|                                               |                                       | <b>Standard Deviation</b>    | 0.22 |
|                                               |                                       |                              |      |
| NN dialky N'N' dialky tertiary urea           | [CX4]N([CX4])C(=O)N([CX4])[CX4]       | 1_1_3_3-tetramethylurea      | 8.50 |
|                                               |                                       | 1_1_3_3-tetraethylurea       | 8.50 |
|                                               |                                       |                              |      |
|                                               |                                       | <b>Average</b>               | 8.50 |
|                                               |                                       | <b>Standard Deviation</b>    | 0.00 |
|                                               |                                       |                              |      |
| N aryl N alkyl N' alkyl N' aryl tertiary urea | [c]N([CX4])C(=O)N([CX4])[c]           | 1_3-diphenyl-1_3-diethylurea | 7.90 |
|                                               |                                       |                              |      |
|                                               |                                       | <b>Average</b>               | 7.90 |

|                                      |                                                     |                               |      |
|--------------------------------------|-----------------------------------------------------|-------------------------------|------|
|                                      |                                                     | <b>Standard Deviation</b>     | 0.00 |
| NN diaryl N'N' dialkyl tertiary urea | [c]N([c])C(=O)N([CX4])[CX4]                         | 1_1-diphenyl-3_3-dimethylurea | 7.70 |
|                                      |                                                     | 1_1-diphenyl-3_3-diethylurea  | 7.70 |
|                                      |                                                     | <b>Average</b>                | 7.70 |
|                                      |                                                     | <b>Standard Deviation</b>     | 0.00 |
| NN diaryl N'N' diaryl tertiary urea  | [c]N([c])C(=O)N([CX4])[CX4]                         | 1_1_3_3-tetraphenylurea       | 6.90 |
|                                      |                                                     | <b>Average</b>                | 6.90 |
|                                      |                                                     | <b>Standard Deviation</b>     | 0.00 |
| Alkyl nitrile                        | N#C[CX4]([CX4H])([CX4H])([CX4H])                    | isobutylnitrile               | 5.28 |
|                                      |                                                     | trimethylacetonitrile         | 5.26 |
|                                      |                                                     | propionitrile                 | 5.19 |
|                                      |                                                     | 1-Cyanobutane                 | 5.16 |
|                                      |                                                     | 1-Cyanopentane                | 5.15 |
|                                      |                                                     | acetonitrile                  | 5.08 |
|                                      |                                                     | <b>Average</b>                | 5.19 |
|                                      |                                                     | <b>Standard Deviation</b>     | 0.07 |
| Mono Chloro Nitrile                  | N#C[CX4]([Cl])([CX4H])([CX4H])                      | Chloroacetonitrile            | 3.93 |
|                                      |                                                     | <b>Average</b>                | 3.93 |
|                                      |                                                     | <b>Standard Deviation</b>     | 0.00 |
| Dichloro Nitrile                     | N#C[CX4]([Cl])([Cl])([CX4H])                        | Dichloroacetonitrile          | 3.40 |
|                                      |                                                     | <b>Average</b>                | 3.40 |
|                                      |                                                     | <b>Standard Deviation</b>     | 0.00 |
| Aryl nitrile                         | N#CC:1:c(:c(:c(:c(:c:1[CeH])[CeH])[CeH])[CeH])[CeH] | 2_6-dimethylbenzonitrile      | 4.97 |
|                                      |                                                     | benzonitrile                  | 4.84 |
|                                      |                                                     | 3-Toluonitrile                | 4.95 |

|                               |                                                                     |                           |      |
|-------------------------------|---------------------------------------------------------------------|---------------------------|------|
|                               |                                                                     |                           |      |
|                               |                                                                     | <b>Average</b>            | 4.92 |
|                               |                                                                     | <b>Standard Deviation</b> | 0.07 |
|                               |                                                                     |                           |      |
| Para halogenated aryl nitrile | <chem>N#CC:1:c(:c(:c(:c(:c:1[CcH])[CcH])[FCIBrI])[CcH])[CcH]</chem> | 4-fluorobenzonitrille     | 4.66 |
|                               |                                                                     | 4-Chlorobenzonitrille     | 4.53 |
|                               |                                                                     |                           |      |
|                               |                                                                     | <b>Average</b>            | 4.59 |
|                               |                                                                     | <b>Standard Deviation</b> | 0.09 |
|                               |                                                                     |                           |      |
| Benzyl nitrile                | <chem>N#CC(c:1:c:c:c:c:1)([CX4H])[CX4H]</chem>                      | Phenylacetoneitrille      | 4.80 |
|                               |                                                                     |                           |      |
|                               |                                                                     | <b>Average</b>            | 4.80 |
|                               |                                                                     | <b>Standard Deviation</b> | 0.00 |
|                               |                                                                     |                           |      |
| Allyl Nitrile                 | <chem>N#CC(C=C)([CX4H])[CX4H]</chem>                                | allylcyanide              | 4.99 |
|                               |                                                                     |                           |      |
|                               |                                                                     | <b>Average</b>            | 4.99 |
|                               |                                                                     | <b>Standard Deviation</b> | 0.00 |
|                               |                                                                     |                           |      |
| Nitrile C=C                   | <chem>N#CC=C</chem>                                                 | acrylonitrile             | 4.62 |
|                               |                                                                     |                           |      |
|                               |                                                                     | <b>Average</b>            | 4.62 |
|                               |                                                                     | <b>Standard Deviation</b> | 0.00 |
|                               |                                                                     |                           |      |
| Phenol                        | <chem>c:1(:c(:c(:c(:c:1[CcH])[CcH])O[H])[CcH])[CcH])[CcH]</chem>    | Phenol                    | 2.90 |
|                               |                                                                     | 3-methylphenol            | 3.10 |
|                               |                                                                     | 4-methylphenol            | 3.10 |
|                               |                                                                     |                           |      |
|                               |                                                                     | <b>Average</b>            | 3.02 |
|                               |                                                                     | <b>Standard Deviation</b> | 0.00 |
|                               |                                                                     |                           |      |
| Alkyl nitro                   | <chem>N(=O)(=O)[CX4]</chem>                                         | 2-Methyl-2-nitropropane   | 4.00 |
|                               |                                                                     | 2-Nitropropane            | 4.00 |
|                               |                                                                     | Nitroethane               | 3.80 |
|                               |                                                                     | Nitromethane              | 3.70 |
|                               |                                                                     |                           |      |

|                             |                                           |                             |      |
|-----------------------------|-------------------------------------------|-----------------------------|------|
|                             |                                           | <b>Average</b>              | 3.88 |
|                             |                                           | <b>Standard Deviation</b>   | 0.15 |
|                             |                                           |                             |      |
| Aryl nitro                  | <chem>N(=O)(=O)[c]</chem>                 | 4-Nitrotoluene              | 3.80 |
|                             |                                           | Nitrobenzene                | 3.70 |
|                             |                                           |                             |      |
|                             |                                           | <b>Average</b>              | 3.75 |
|                             |                                           | <b>Standard Deviation</b>   | 0.07 |
|                             |                                           |                             |      |
|                             |                                           |                             |      |
| Dialkyl sulphoxide          | <chem>[SX3](=O)([CX4])[CX4]</chem>        | Di-isopropyl sulphoxide     | 8.75 |
|                             |                                           | Dibutyl sulphoxide          | 8.71 |
|                             |                                           | Dimethyl sulphoxide         | 8.60 |
|                             |                                           |                             |      |
|                             |                                           | <b>Average</b>              | 8.68 |
|                             |                                           | <b>Standard Deviation</b>   | 0.08 |
|                             |                                           |                             |      |
| Alkyl aryl sulphoxide       | <chem>[SX3](=O)([c])[CX4]</chem>          | (methylsulfinyl)benzene     | 7.83 |
|                             |                                           |                             |      |
|                             |                                           | <b>Average</b>              | 7.83 |
|                             |                                           | <b>Standard Deviation</b>   | 0.00 |
|                             |                                           |                             |      |
| Diaryl sulphoxide           | <chem>[SX3](=O)([c])[c]</chem>            | Di(p-tolyl) sulphoxide      | 7.77 |
|                             |                                           | Diphenyl sulphoxide         | 7.48 |
|                             |                                           |                             |      |
|                             |                                           | <b>Average</b>              | 7.63 |
|                             |                                           | <b>Standard Deviation</b>   | 0.20 |
|                             |                                           |                             |      |
|                             |                                           |                             |      |
| Secondary cyclic thioamide  | <chem>[CR](=S)([cCX4])N([CX4c])[H]</chem> | $\epsilon$ -Thiocaprolactam | 6.62 |
|                             |                                           |                             |      |
|                             |                                           | <b>Average</b>              | 6.62 |
|                             |                                           | <b>Standard Deviation</b>   | 0.00 |
|                             |                                           |                             |      |
|                             |                                           |                             |      |
| Secondary acyclic thioamide | <chem>[CR](=S)([cCX4])N([CX4c])[H]</chem> | N-Methylthioacetamide       | 5.59 |
|                             |                                           |                             |      |
|                             |                                           | <b>Average</b>              | 5.59 |

|                          |                           |                              |       |
|--------------------------|---------------------------|------------------------------|-------|
|                          |                           | <b>Standard Deviation</b>    | 0.00  |
| Tertiary thioformamide   | [H]C(=S)N([CX4])[CX4]     | N_N-dimethylthioformamide    | 5.40  |
|                          |                           | <b>Average</b>               | 5.40  |
|                          |                           | <b>Standard Deviation</b>    | 0.00  |
| Tertiary alkyl thioamide | C(=S)([CX4])N([CX4])[CX4] | N_N-dimethylthioacetamide    | 6.00  |
|                          |                           | <b>Average</b>               | 6.00  |
|                          |                           | <b>Standard Deviation</b>    | 0.00  |
| Tertiary thiobenzamide   | C(=S)(c)N([CX4])[CX4]     | 4_N_N-trimethylthiobenzamide | 5.60  |
|                          |                           | N_N-dimethylthiobenzamide    | 5.30  |
|                          |                           | <b>Average</b>               | 5.45  |
|                          |                           | <b>Standard Deviation</b>    | 0.21  |
| Trialkyl phosphine oxide | P=O([CX4])([CX4])([CX4])  | Triethylphosphine oxide      | 11.10 |
|                          |                           | Tripropyl oxide              | 10.80 |
|                          |                           | Trimethylphosphine oxide     | 10.70 |
|                          |                           | Tributylphosphine oxide      | 10.20 |
|                          |                           | <b>Average</b>               | 10.70 |
|                          |                           | <b>Standard Deviation</b>    | 0.37  |
| Triaryl phosphine oxide  | P=O([c])([c])([c])        | Triphenylphosphine oxide     | 10.10 |
|                          |                           | <b>Average</b>               | 10.10 |
|                          |                           | <b>Standard Deviation</b>    | 0.00  |
| Phosphine                | [PX3]([Cc])([Cc])[cC]     | Triphenyl phosphine          | 5.52  |
|                          |                           | <b>Average</b>               | 5.52  |
|                          |                           | <b>Standard Deviation</b>    | 0.00  |

|                                      |                                              |                                 |      |
|--------------------------------------|----------------------------------------------|---------------------------------|------|
| Sulphone alkyl alkyl                 | <chem>S(=O)(=O)([CX4])([CX4])</chem>         | Tetramethylene sulfone          | 6.30 |
|                                      |                                              | Dimethyl sulphone               | 6.20 |
|                                      |                                              | Dibutyl sulphone                | 6.40 |
|                                      |                                              |                                 |      |
|                                      |                                              | <b>Average</b>                  | 6.30 |
|                                      |                                              | <b>Standard Deviation</b>       | 0.10 |
|                                      |                                              |                                 |      |
| Sulphone aryl aryl                   | <chem>S(=O)(=O)([c])([c])</chem>             | Diphenyl sulphone               | 5.90 |
|                                      |                                              |                                 |      |
|                                      |                                              | <b>Average</b>                  | 5.90 |
|                                      |                                              | <b>Standard Deviation</b>       | 0.00 |
|                                      |                                              |                                 |      |
|                                      |                                              | Dihydro-2(3H)-thiophenone       | 5.15 |
|                                      |                                              |                                 |      |
| Thioester                            | <chem>C(=O)([cCX4])S[cCX4]</chem>            | <b>Average</b>                  | 5.20 |
|                                      |                                              | <b>Standard Deviation</b>       | 0.00 |
|                                      |                                              |                                 |      |
| Secondary sulphonamide               | <chem>[cC]S(=O)(=O)N([H])([cC])</chem>       | N-Methylmethanesulphonamide     | 5.85 |
|                                      |                                              |                                 |      |
|                                      |                                              | <b>Average</b>                  | 5.85 |
|                                      |                                              | <b>Standard Deviation</b>       | 0.00 |
|                                      |                                              |                                 |      |
| Tertiary sulphonamide NN dialkyl     | <chem>S(=O)(=O)([CX4])N([CX4])([CX4])</chem> | N,N-Dimethylmethanesulphonamide | 5.95 |
|                                      |                                              |                                 |      |
|                                      |                                              | <b>Average</b>                  | 5.95 |
|                                      |                                              | <b>Standard Deviation</b>       | 0.00 |
|                                      |                                              |                                 |      |
| Tertiary sulphonbenzamide NN dialkyl | <chem>S(=O)(=O)([c])N([CX4])([CX4])</chem>   | N,N-Dimethylbenzenesulphonamide | 5.71 |
|                                      |                                              |                                 |      |
|                                      |                                              | <b>Average</b>                  | 5.71 |
|                                      |                                              | <b>Standard Deviation</b>       | 0.00 |
|                                      |                                              |                                 |      |
| Tertiary sulphonamide N              | <chem>S(=O)(=O)([CX4])N([c])([CX4])</chem>   | N-Methyl-N-Benzylsulfonamide    | 5.22 |

|                                         |                            |                             |      |
|-----------------------------------------|----------------------------|-----------------------------|------|
| alkyl N aryl                            |                            |                             |      |
|                                         |                            | <b>Average</b>              | 5.22 |
|                                         |                            | <b>Standard Deviation</b>   | 0.00 |
| Dialkyl thioether                       | [CX4][SX2][CX4]            | Diisopropyl sulphide        | 3.80 |
|                                         |                            | tert-butyl n-butyl sulphide | 3.70 |
|                                         |                            | Sec-butyl n-butyl sulphide  | 3.60 |
|                                         |                            | Dibutyl sulphide            | 3.60 |
|                                         |                            | Di(tert-butyl) sulphide     | 3.60 |
|                                         |                            | Diethyl sulphide            | 3.60 |
|                                         |                            | Dimethyl sulphide           | 3.50 |
|                                         |                            | Isobuty n-butyl sulphide    | 3.50 |
|                                         |                            |                             |      |
|                                         |                            | <b>Average</b>              | 3.61 |
|                                         |                            | <b>Standard Deviation</b>   | 0.10 |
| Tertiary carbamate<br>NN dialky O alkyl | O(C(=O)N([CX4])[CX4])[CX4] | Ethyl diethylcarbamate      | 7.40 |
|                                         |                            | Ethyl dimethylcarbamate     | 7.10 |
|                                         |                            | Methyl dimethylcarbamate    | 7.10 |
|                                         |                            |                             |      |
|                                         |                            | <b>Average</b>              | 7.20 |
|                                         |                            | <b>Standard Deviation</b>   | 0.17 |
| Tertiary carbamate<br>NN diaryl O alkyl | O(C(=O)N([c])[c])[CX4]     | Ethyl diphenylcarbamate     | 6.30 |
|                                         |                            | Methyl diphenylcarbamate    | 6.20 |
|                                         |                            |                             |      |
|                                         |                            | <b>Average</b>              | 6.25 |
|                                         |                            | <b>Standard Deviation</b>   | 0.07 |
| Tertiary carbamate<br>NN diaryl O aryl  | O(C(=O)N([c])[c])[c]       | Phenyl diphenylcarbamate    | 5.70 |
|                                         |                            |                             |      |
|                                         |                            | <b>Average</b>              | 5.70 |
|                                         |                            | <b>Standard Deviation</b>   | 0.00 |
| Thiocyanate                             | [CX4]SC#N                  | Methyl thiocyanate          | 4.68 |

|                |                                                                 |                           |      |
|----------------|-----------------------------------------------------------------|---------------------------|------|
|                |                                                                 | Ethyl thiocyanate         | 4.39 |
|                |                                                                 |                           |      |
|                |                                                                 | <b>Average</b>            | 4.54 |
|                |                                                                 | <b>Standard Deviation</b> | 0.21 |
|                |                                                                 |                           |      |
|                |                                                                 |                           |      |
| Isothiocyanate | <chem>[cCX4]N=C=S</chem>                                        | Ethyl isothiocyanate      | 2.92 |
|                |                                                                 |                           |      |
|                |                                                                 | <b>Average</b>            | 2.90 |
|                |                                                                 | <b>Standard Deviation</b> | 0.00 |
|                |                                                                 |                           |      |
| Pyridine       | <chem>[nX2]1cccc1</chem>                                        | 2_4_6-Trimethylpyridine   | 8.10 |
|                |                                                                 | 3_4-Dimethylpyridine      | 8.00 |
|                |                                                                 | 3_5-Dimethylpyridine      | 8.00 |
|                |                                                                 | 2_6-Dimethylpyridine      | 7.80 |
|                |                                                                 | 4-tert-Butylpyridine      | 7.70 |
|                |                                                                 | 4-Methylpyridine          | 7.70 |
|                |                                                                 | 4-Ethylpyridine           | 7.70 |
|                |                                                                 | 2-Methylpyridine          | 7.60 |
|                |                                                                 | 3-Ethylpyridine           | 7.50 |
|                |                                                                 | 3-Methylpyridine          | 7.50 |
|                |                                                                 | 4-Phenylpyridine          | 7.40 |
|                |                                                                 | 4-Isopropylpyridine       | 7.40 |
|                |                                                                 | 4-Vinylpyridine           | 7.40 |
|                |                                                                 | 2-Ethylpyridine           | 7.40 |
|                |                                                                 | 2_4-Dimethylpyridine      | 7.20 |
|                |                                                                 | 2-Butylpyridine           | 7.20 |
|                |                                                                 | Pyridine                  | 7.20 |
|                |                                                                 | 2-Isopropylpyridine       | 7.00 |
|                |                                                                 | 2-Vinylpyridine           | 6.70 |
|                |                                                                 | 2_6-Diethylpyridine       | 6.60 |
|                |                                                                 | 2-Phenylpyridine          | 6.20 |
|                |                                                                 |                           |      |
|                |                                                                 | <b>Average</b>            | 7.40 |
|                |                                                                 | <b>Standard Deviation</b> | 0.48 |
|                |                                                                 |                           |      |
| Pyrimidine     | <chem>c1([nX2]c([nX2]c(c1[CX4cH])[CX4cH])[CX4cH])[CX4cH]</chem> | 4_6-dimethylpyrimidine    | 6.33 |
|                |                                                                 | Pyrimidine                | 5.44 |
|                |                                                                 |                           |      |

|                                     |                                                          |                                     |      |
|-------------------------------------|----------------------------------------------------------|-------------------------------------|------|
|                                     |                                                          |                                     |      |
|                                     |                                                          | <b>Average</b>                      | 5.88 |
|                                     |                                                          | <b>Standard Deviation</b>           | 0.63 |
|                                     |                                                          |                                     |      |
| Triazine                            | <chem>c:1(:n:c(:n:c(:n:1)[CX4cH])[CX4cH])[CX4cH]</chem>  | S-triazine                          | 3.77 |
|                                     |                                                          | <b>Average</b>                      | 3.77 |
|                                     |                                                          | <b>Standard Deviation</b>           | 0.00 |
|                                     |                                                          |                                     |      |
| Thiourea NN alkyl<br>N' alkyl       | <chem>C(=S)(N([CX4])[H])N([CX4])[CX4]</chem>             | N-Methyl-N_N'-propylenethiourea     | 7.51 |
|                                     |                                                          | <b>Average</b>                      | 7.51 |
|                                     |                                                          | <b>Standard Deviation</b>           | 0.00 |
|                                     |                                                          |                                     |      |
| Thiourea NN<br>dialkyl N'N' dialkyl | <chem>C(=S)(N([CX4])[CX4])N([CX4])[CX4]</chem>           | N_N'_N'_N'-Tetramethylthiourea      | 6.06 |
|                                     |                                                          | N_N'-Dimethyl-N_N'-ethylenethiourea | 5.99 |
|                                     |                                                          | N_N'-Dimethyl-N'_N'-diethylthiourea | 5.93 |
|                                     |                                                          | <b>Average</b>                      | 5.99 |
|                                     |                                                          | <b>Standard Deviation</b>           | 0.07 |
|                                     |                                                          |                                     |      |
| Furan                               | <chem>O1C=CC=C1</chem>                                   | Furan                               | 2.20 |
|                                     |                                                          | <b>Average</b>                      | 2.20 |
|                                     |                                                          | <b>Standard Deviation</b>           | 0.00 |
|                                     |                                                          |                                     |      |
| Thiophene                           | <chem>S1C=CC=C1</chem>                                   | Thiophene                           | 2.20 |
|                                     |                                                          | <b>Average</b>                      | 2.20 |
|                                     |                                                          | <b>Standard Deviation</b>           | 0.00 |
|                                     |                                                          |                                     |      |
| Imidazole                           | <chem>N1(C(=[NX2]C(=C1[CX4Hc])[CX4Hc])[CX4Hc])[H]</chem> | 1-methylimidazole                   | 9.06 |
|                                     |                                                          | 4-methylimidazole                   | 8.93 |
|                                     |                                                          | Imidazole                           | 8.55 |
|                                     |                                                          | <b>Average</b>                      | 8.85 |

|                |                                                     |                              |      |
|----------------|-----------------------------------------------------|------------------------------|------|
|                |                                                     | <b>Standard Deviation</b>    | 0.27 |
| Pyrrole        | <chem>N1(C(=C(C(=C1[CX4H]))[CX4H]))[CX4H][H]</chem> | Pyrrole                      | 4.12 |
|                |                                                     | 1-Methylpyrrole              | 3.65 |
|                |                                                     | <b>Average</b>               | 3.88 |
|                |                                                     | <b>Standard Deviation</b>    | 0.34 |
| Thiazole       | <chem>S1C(=C(N=C1[CX4H]))[CX4H][CX4H]</chem>        | Thiazole                     | 7.28 |
|                |                                                     | <b>Average</b>               | 7.28 |
|                |                                                     | <b>Standard Deviation</b>    | 0.00 |
| Thiazole aryl  | <chem>c:1:c2:c(:c:c:c:1)N=CS2</chem>                | Benzothiazole                | 6.06 |
|                |                                                     | <b>Average</b>               | 6.06 |
|                |                                                     | <b>Standard Deviation</b>    | 0.00 |
| Isoxazole      | <chem>O1N=C(C(=C1[CX4H]))[CX4H][CX4H]</chem>        | Isoxazole                    | 4.70 |
|                |                                                     | <b>Average</b>               | 4.70 |
|                |                                                     | <b>Standard Deviation</b>    | 0.00 |
| Oxazole        | <chem>O1C=CN=C1</chem>                              | Oxazole                      | 5.77 |
|                |                                                     | <b>Average</b>               | 5.77 |
|                |                                                     | <b>Standard Deviation</b>    | 0.00 |
| Pyrazole       | <chem>N1=CC=CN1[H]</chem>                           | 1-methylpyrazole             | 7.15 |
|                |                                                     | <b>Average</b>               | 7.15 |
|                |                                                     | <b>Standard Deviation</b>    | 0.00 |
| 1,2,3 triazole | <chem>N1=CC=NN1[cC]</chem>                          | 1-Phenylethyl-1_2_3-triazole | 7.32 |
|                |                                                     | 1-Methylbenzotriazole        | 6.64 |
|                |                                                     | <b>Average</b>               | 6.98 |

|                         |                                |                                       |                   |
|-------------------------|--------------------------------|---------------------------------------|-------------------|
|                         |                                | <b>Standard Deviation</b>             | 0.48              |
| 1,3,4 triazole          | C1=NC=NN1[cCX4]                | 1-Butyl-1_3_4-triazole                | 7.00              |
|                         |                                | <b>Average</b>                        | 7.00              |
|                         |                                | <b>Standard Deviation</b>             | 0.00              |
| 1,2,4 triazole          | C1=NN=CN1[cCX4]                | 1-Benzyl-1_2_4-triazole               | 7.00              |
|                         |                                | <b>Average</b>                        | 7.00              |
|                         |                                | <b>Standard Deviation</b>             | 0.00              |
| Chloride anion          | [Cl-1X0]                       | Tetrabutyl ammonium chloride          | 12.10             |
|                         |                                | <b>Average</b>                        | 12.10             |
|                         |                                | <b>Standard Deviation</b>             | 0.30 <sup>a</sup> |
| Bromide anion           | [Br-1X0]                       | Tetraethyl ammonium bromide           | 10.60             |
|                         |                                | Tetrabutyl ammonium bromide           | 10.60             |
|                         |                                | Tetraoctyl ammonium bromide           | 10.60             |
|                         |                                | <b>Average</b>                        | 10.60             |
|                         |                                | <b>Standard Deviation</b>             | 0.20 <sup>a</sup> |
| Iodide anion            | [I-1X0]                        | Tetrabutyl ammonium iodide            | 8.90              |
|                         |                                | Tetrahexyl ammonium iodide            | 9.10              |
|                         |                                | <b>Average</b>                        | 9.00              |
|                         |                                | <b>Standard Deviation</b>             | 0.10 <sup>a</sup> |
| Hydrogen sulphate anion | S(=[OX1])(=[OX1])([OX1])O([H]) | Tetrabutyl ammonium hydrogen sulphate | 10.40             |
|                         |                                | <b>Average</b>                        | 10.40             |
|                         |                                | <b>Standard Deviation</b>             | 0.60 <sup>a</sup> |
| Fluoro alkane           | [CX4]F                         | 1-Fluoropentane                       | 2.93              |
|                         |                                | 1-Fluorooctane                        | 3.11              |
|                         |                                | Fluorocyclohexane                     | 3.26              |

|               |         |                           |      |
|---------------|---------|---------------------------|------|
|               |         | <b>Average</b>            | 3.10 |
|               |         | <b>Standard Deviation</b> | 0.17 |
|               |         |                           |      |
| Chloro alkane | [CX4]Cl | 1-Chlorobutane            | 2.15 |
|               |         | 1-Chloropentane           | 2.22 |
|               |         | 2-Chloropropane           | 2.40 |
|               |         | Chlorocyclohexane         | 2.46 |
|               |         | 1-Chloroadamantane        | 2.66 |
|               |         |                           |      |
|               |         | <b>Average</b>            | 2.38 |
|               |         | <b>Standard Deviation</b> | 0.20 |
|               |         |                           |      |
| Bromo alkane  | [CX4]Br | Bromocyclopropane         | 2.02 |
|               |         | Bromoethane               | 2.17 |
|               |         | 1-Bromopropane            | 2.22 |
|               |         | 1-Bromopentane            | 2.28 |
|               |         | 1-Bromobutane             | 2.31 |
|               |         | Bromocyclohexane          | 2.51 |
|               |         |                           |      |
|               |         | <b>Average</b>            | 2.25 |
|               |         | <b>Standard Deviation</b> | 0.16 |
|               |         |                           |      |
| Aryl bromide  | cBr     | Bromobenzene              | 1.38 |
|               |         |                           |      |
|               |         | <b>Average</b>            | 1.38 |
|               |         | <b>Standard Deviation</b> | 0.00 |
|               |         |                           |      |
| Iodo alkane   | [CX4]I  | Iodomethane               | 2.02 |
|               |         | Iodoethane                | 2.02 |
|               |         | 1-Iodopentane             | 2.24 |
|               |         | 2-Iodopropane             | 2.24 |
|               |         | 1-Iodoadamantane          | 2.64 |
|               |         |                           |      |
|               |         | <b>Average</b>            | 2.23 |
|               |         | <b>Standard Deviation</b> | 0.25 |
|               |         |                           |      |
| Aryl iodide   | cI      | Iodobenzene               | 1.50 |
|               |         |                           |      |
|               |         | <b>Average</b>            | 1.50 |

|                  |                                                         |                           |      |
|------------------|---------------------------------------------------------|---------------------------|------|
|                  |                                                         | <b>Standard Deviation</b> | 0.00 |
| Pyrazine         | c:1(:c(:c(:c(:n:n:1)[CX4cH])[CX4cH])<br>)[CX4cH][CX4cH] | 2_5-dimethylpyrazine      | 5.93 |
|                  |                                                         | Pyrazine                  | 5.11 |
|                  |                                                         |                           |      |
|                  |                                                         | <b>Average</b>            | 5.52 |
|                  |                                                         | <b>Standard Deviation</b> | 0.58 |
|                  |                                                         |                           |      |
| Pyridazine       | c:1(:c(:n:c(:c(:n:1)[CX4cH])[CX4cH])<br>)[CX4cH][CX4cH] | Pyridazine                | 6.73 |
|                  |                                                         | <b>Average</b>            | 6.73 |
|                  |                                                         | <b>Standard Deviation</b> | 0.00 |
|                  |                                                         |                           |      |
| Pyridine N-oxide | c:1:c:c:[n](c:c:1)[OX1]                                 | Pyridine N-oxide          | 9.00 |
|                  |                                                         |                           |      |
|                  |                                                         | <b>Average</b>            | 9.00 |
|                  |                                                         | <b>Standard Deviation</b> | 0.00 |

<sup>a</sup> Standard deviations based on measurements reported in different solvents.
